# Supplementary material for: TNFSF14-Derived Molecules as a Novel Treatment for Obesity and Type 2 Diabetes
Source: MDPI journal article supplement (doi:10.3390/ijms221910647), 2021-09-30
Supplement: s1 [file s1]

## TNFSF14-Derived Molecules as a Novel Treatment for Obesity and Type 2 Diabetes

Mark Agostino <sup>1,2,3</sup>, Jennifer Rooney <sup>4</sup>, Lakshini Herat <sup>4</sup>, Jennifer Matthews <sup>4</sup>, Allyson Simonds <sup>1</sup>, Susan E. Northfield <sup>5</sup>, Denham Hopper <sup>5,6</sup>, Markus P Schlaich <sup>4,7,8,9</sup> and Vance B Matthews <sup>4,\*</sup>

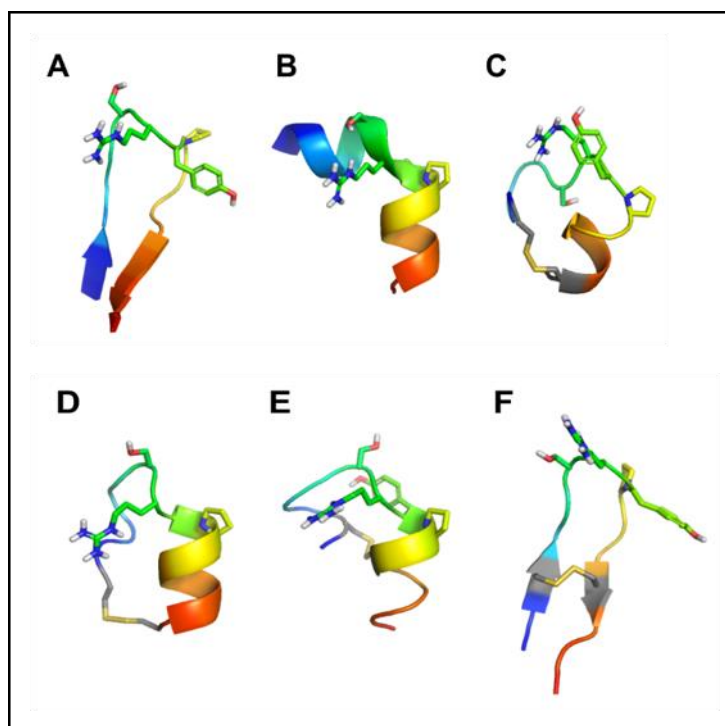

**Figure S1.** Optimisation of peptide 2 via introduction of disulfide crosslinks to maintain  $\beta$ -hairpin geometry. A. Peptide 2 conformation as in homology-modelled structure of mouse TNFSF14. B. Top-ranked conformation of peptide 2 obtained from PEP-FOLD. C. Top-ranked conformation of peptide 2.1 obtained from PEP-FOLD. D. Top-ranked conformation of peptide 2.2 obtained from PEP-FOLD. E. Top-ranked conformation of peptide 2.3 obtained from PEP-FOLD. F. Top-ranked conformation of peptide 2.4 obtained from PEP-FOLD. Conformations taken from PEP-FOLD were energy minimised in Prime. All panels coloured in red-to-blue rainbow from N- to C-terminus; disulfide crosslinks shown in grey.

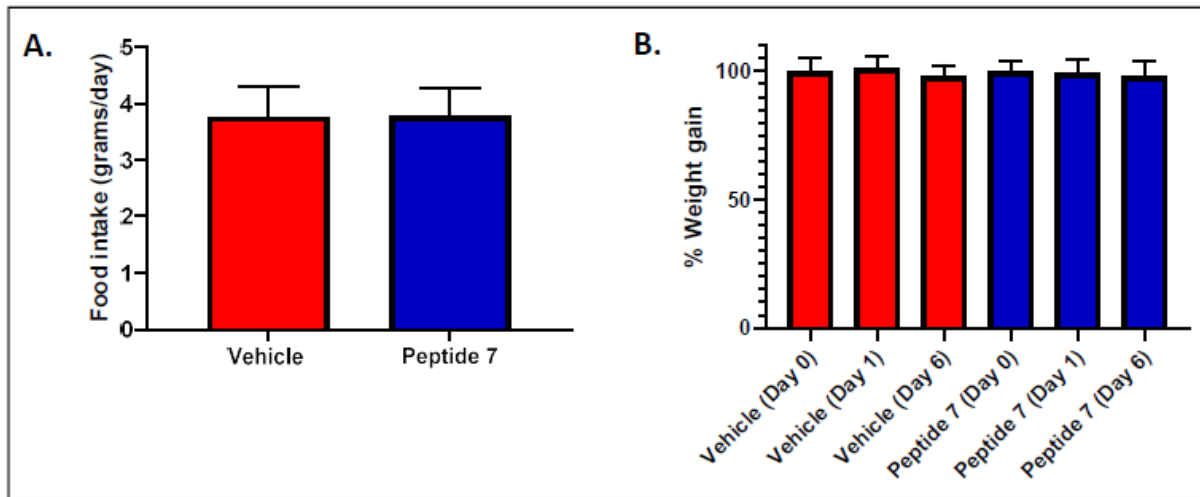

**Figure S2.** Peptide 7 does not affect food intake or weight loss in high fat diet fed mice. **A.** Daily food intake and **B.** Weight gain after 24hr and 6 days of treatment with vehicle or Peptide 7. Mean + SD.

**Supplementary Table 1.** Sequence alignments used for homology modelling.

| Protein and template | Sequence alignment                                                                                                                                                                                                                                                                                                                                                                                                |
|----------------------|-------------------------------------------------------------------------------------------------------------------------------------------------------------------------------------------------------------------------------------------------------------------------------------------------------------------------------------------------------------------------------------------------------------------|
| mTNFSF14             | EVNPA AHLTG ANSSLTGSGGPLLWETQLGLAFLRGLSYHDGALVVTK                                                                                                                                                                                                                                                                                                                                                                 |
| hTNFSF14 (PDB 4RSU)  | QANPAAHLTGANASLIGIGGPLLWETRLGLAFLRGLTYHDGALVTME<br>: . ***** : ** . * ***** . ***** : ***** :<br><br>AGYYYIYSKVQLGGVGCPLGLAS . . TITHGLYKRTPRYPEELELLVS<br>PGYYYVYSKVQLSGVGCPLGLANGLPITHGLYKRTSRYPKLELLVS<br>. **** : ***** ***** * * . ***** * * *****<br><br>QQSPCGRATSSSRVWWDSSFLGGVVHLEAGEEVVVRVLDRLV<br>RRSPCGRANSS . RVWWDSSFLGGVVHLEAGEEVVVRVPGNRLV<br>. . ***** . ** ***** : ***                          |
| mTNFRSF14            | RSLPSCKEDEYFVGSECCPKCSPGYRVKEACGELTGTVCPEPCPPGT                                                                                                                                                                                                                                                                                                                                                                   |
| hTNFRSF14 (PDB 4RSU) | SAQPSQRQEFLVGDECCPMCPNGYHVKQVCSEHTGTVCAPCPPQTY<br>. **** : : : * : * * * * * * . * * * * : . * * * * * * * * *<br><br>IAHLNGLSKCLQCQMCDPAMGLRASRNCSTENAVCGCSPGHFCIVQ<br>TAHANGLSKCLPCGVCDPDMGLLTWQECSSWKDTCRCIPGYFCENQ<br>. * * . ***** * . * * * * * * . : * * : . * * * * : * * *<br><br>DGDHCAACRAYATSSPGQRVQKGGTESQDTLCT<br>DGSHCSTCLQHTTCPPGQRVKRGTHDQDTVCA<br>* * * * : . * : . * : * * * * : * * * * : * . |
| mLTBR                | CRDQEKEYYEPQHRICCSRCPPGTYSKCSRIKRDTCATCAENSYN                                                                                                                                                                                                                                                                                                                                                                     |
| hLTBR (PDB 4MXW)     | CWDQDKEYYEPMDVCCSRCPPGEFVFAVCSRSQDTVCKTCPHNSYN<br>* * * : ***** * : ***** : * * * * : ***** * * . * * *<br><br>EHWNYLTICQLCRPCDPV . . . . EIAPCTSKRKTQCRCC . . . . .<br>EHWNHLSTCQLCRPCDIVLGFEVAPCTSDRKAECRCQPGMSCVYLD<br>* * * * : * : . ***** * * : * * * * * * : * * *<br><br>. . CT<br>NECV<br>* :                                                                                                            |
